# Supplementary material
Source: publisher site journal article supplement (https://www.dovepress.com/article/459009)
Supplement: Supplementary file 1 [file get_supplementary_file.php]

# **Supplementary Tables and Figures**

**Table S1** Effect of Score on Hypertensive Renal Damage progression

| Variable | AUC (95% CI) | *P* value | Cut-off point | Sensitivity | Specificity |
| --- | --- | --- | --- | --- | --- |
| Score | 0.849（0.809-0.892） | < 0.001 | 2 | 0.814 | 0.794 |

CI, confidence interval; AUC, area under curve


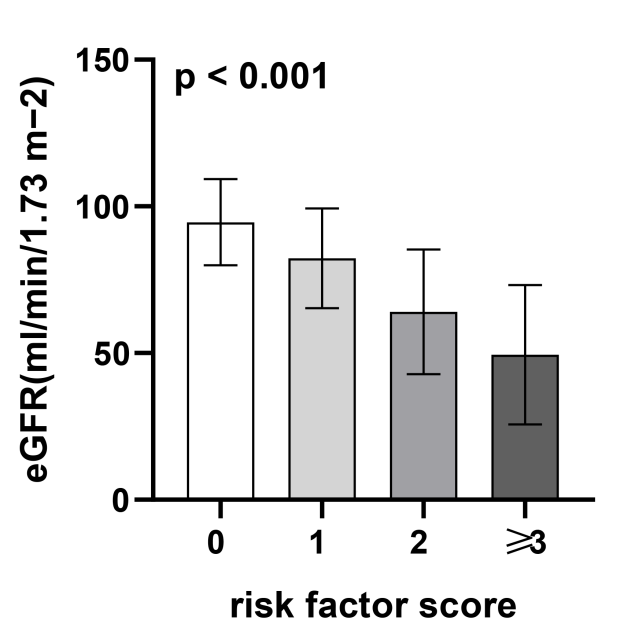


**Figure S1** Changes in renal function based on risk factor score. With the increase of risk factor scores, the eGFR of hypertensive patients after follow-up gradually decreased (*p* < 0.001).
